# Supplementary material for: Effect of ZrO2/CeO2 mixed oxides on fuel gas production during self-sustaining smouldering combustion of lignocellulosic wastes
Source: Royal Society of Chemistry journal article supplement (doi:10.1039/d3se00307h), 2023-01-01

# Supplementary Materials

## Figure S1

Description: Two represented examples of blank experiment and experiment with zirconia-ceria mixed oxides:

- Experiment C0, airflow = 12.5 L/min, no catalyst
- Experiment C15R, airflow = 12.5 L/min, catalysts =  $\text{ZrO}_2/\text{CeO}_2$  - Ru, ceria = 20 wt%

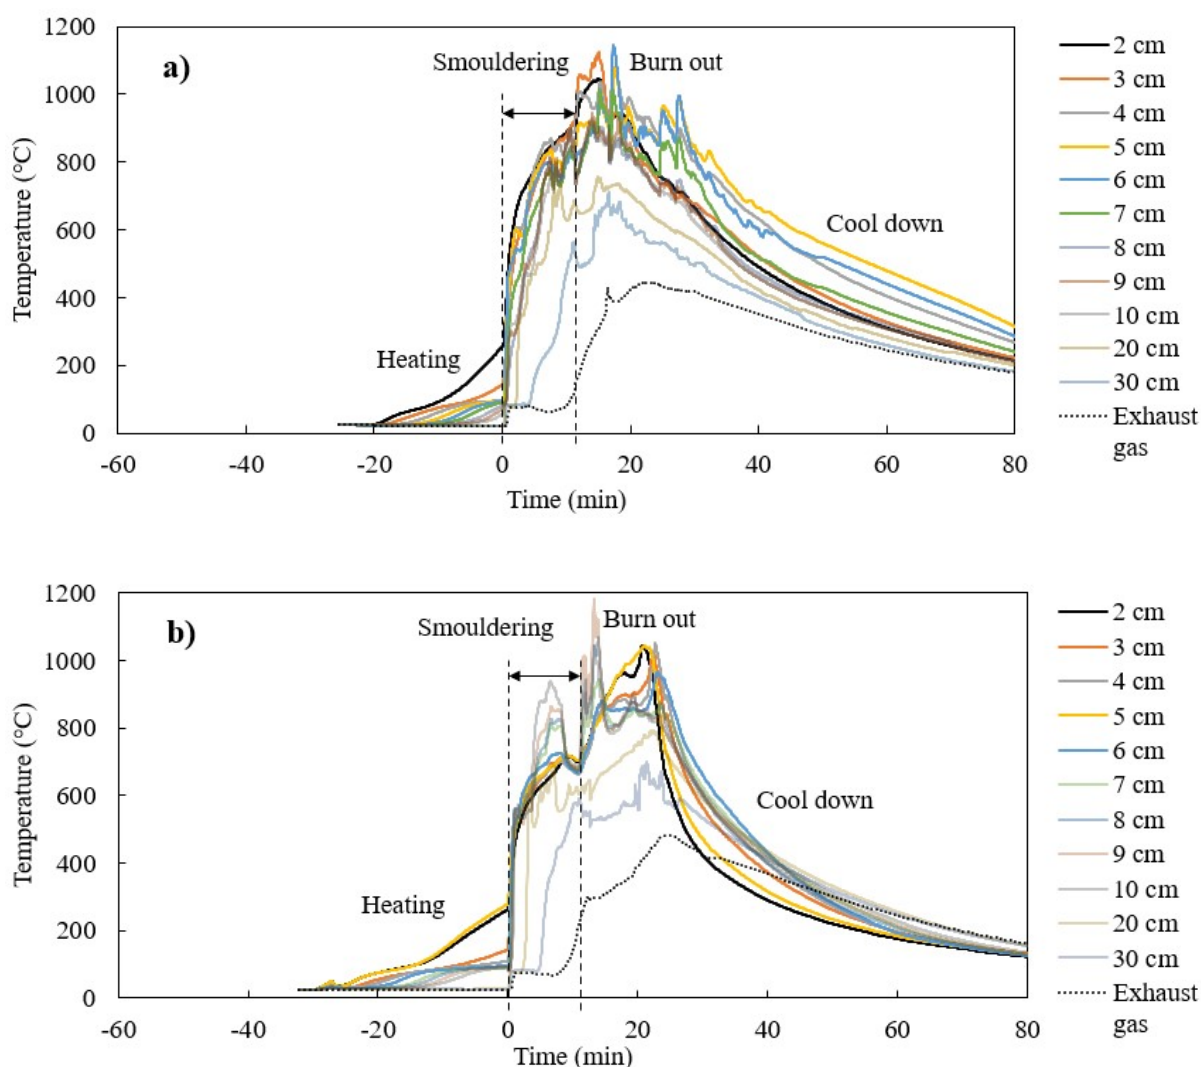

Supplement: d3se00307h1.pdf [file d3se00307h1.pdf]
